# Supplementary material for: Myocardial injury in severe COVID‐19 is similar to pneumonias of other origin: results from a multicentre study
Source: PubMed Central journal article supplement — ESC Heart Fail. 2020 Dec 17;8(1):37–46. doi: 10.1002/ehf2.13136 (PMC7835505; doi:10.1002/ehf2.13136), 2020-12-17
Supplement: EHF2-8-37-s001.pdf [file EHF2-8-37-s001.pdf]

**Supplementary materials**

**eAppendix Table 1. Mean healthcare costs and heart failure-related costs per-patient following a worsening heart failure event a,b**

|  | Time from worsening event | | | |
| --- | --- | --- | --- | --- |
|  | First 30 days  (N=3,087) | 3 months  (N=2,984) | 12 months  (N=2,672) | 24 months  (N=1,277) |
| All outpatient dispensed prescriptions | $322 (724)  (n=2,617) | $919 (1,953)  (n=2,795) | $3,288 (6,798)  (n=2,574) | $7,551 (13,277)  (n=1,272) |
| HF-related medications | $113 (304) (n=2,089) | $309 (705) (n=2,563) | $1,007 (2,034) (n=2,453) | $2,202 (3708) (n=1,252) |
| All outpatient encounters (e.g., private office, clinic) | $609 (3,673) (n=1,806) | $1,733 (7,050) (n=2,276) | $4,910 (12,780) (n=2,339) | $10,445 (25,697) (n=1,225) |
| HF-related outpatient encounters | $201 (3,404) (n=823) | $459 (4,944) (n=1,200) | $1,129 (8,030) (n=1,472) | $2,233 (15,883) (n=852) |
| All hospital encounters c | $7,855 (33,481) (n=1,714) | $20,905 (63,975) (n=2,196) | $54,465 (130,360) (n=2,336) | $114,053 (228,453) (n=1,225) |
| HF-related hospital encounters c | $5,046 (29,088) (n=938) | $13,531 (55,314) (n=1,406) | $33,206 (104,820) (n=1,726) | $68,535 (168,350) (n=965) |
| All hospital admissions | $5,962 (32,102) (n=974) | $14,832 (59,926) (n=1,377) | $36,200 (113,861) (n=1,691) | $72,684 (188,314) (n=964) |
| HF-related hospital admissions | $4,356 (28,340) (n=611) | $11,178 (53,901) (n=959) | $27,049 (100,869) (n=1,267) | $55,267 (160,409) (n=769) |
| Total costs | $8,779 (33,720) | $23,536 (64,909) | $62,615 (132,771) | $131,967 (235,359) |
| Total HF-related costs | $5,359 (29,274) | $14,295 (55,745) | $35,329 (105,657) | $72,947 (170,823) |

a Number of patients alive during observation period is shown in each cell.

b Costs are presented as mean (SD) in 2015 US dollars using unadjusted Historical Consumer Price Index for All Urban Consumers (CPI-U), Medical Care category, row items- Prescription Drugs, Physician Services, Inpatient Hospital Services, Outpatient Hospital Services. HF, heart failure. <https://www.bls.gov/cpi/tables/detailed-reports/archive-2016.zip>

c Defined as admissions, observation visits, and emergency visits.

**eAppendix Figure 1. Total mean adjusted costs following a worsening heart failure event by (a) age, (b) race, and (c) sex**

Costs are in US dollars, inflation-adjusted for 2015.
